# Supplementary material
Source: publisher figshare collection journal article supplement (https://acs.figshare.com/ndownloader/files/5140807)

# Supporting Information

## Two New Hepatoprotective Stilbene Glycosides of *Acer mono* Leaves

Hyekyung Yang,<sup>†</sup> Sang Hyun Sung,<sup>‡</sup> and Young Choong Kim<sup>\*, †</sup>

*College of Pharmacy and Research Institute of Pharmaceutical Science, Seoul National  
University, San 56-1, Sillim-Dong, Gwanak-Gu, Seoul 151-742, Korea, Institute for Life  
Science, Elcom Science Co., Ltd., 235 Guro-Dong, Guro-ku, Seoul 152-848, Korea*

### **Extraction details for known compounds**

**Figure S1.** <sup>1</sup>H NMR spectrum of **1**

**Figure S2.** <sup>13</sup>C NMR spectrum of **1**

**Figure S3.** HMBC spectrum of **1**

**Figure S4.** <sup>1</sup>H NMR spectrum of **2**

**Figure S5.  $^{13}\text{C}$  NMR spectrum of 2**

**Figure S6. HMBC spectrum of 1**

**Extraction details for known compounds.** Quercetin (**3**) (11.7 mg, yellow powder) was obtained from Fr. 4-4-8 by recrystallization from MeOH. Fr. 4-2 was rechromatographed on Sephadex LH-20 column with MeOH to give 6 subfractions (Fr. 4-2-1 to Fr. 4-2-6). Fr. 4-2-4 and Fr. 4-2-5 were recrystallized from MeOH to yield quercitrin (278 mg, yellowish powder) and eriodictyol (100 mg, pale yellowish powder), respectively. Fr. 4-5 was chromatographed on a Sephadex LH-20 column with MeOH to give 2 subfractions (Fr. 4-5-1 to Fr. 4-5-2). Fr. 4-5-2 was rechromatographed on silica gel column with CHCl<sub>3</sub>-MeOH step gradient (CHCl<sub>3</sub>-MeOH, 50:1 → MeOH) to give 9 subfractions (Fr. 4-5-2-1 to Fr. 4-5-2-9). Naringenin (70.7 mg, pale yellowish powder) was obtained from Fr. 4-5-2-1 by recrystallization from MeOH. Eriodictyol-7-*O*-β-D-glucopyranoside (794 mg) was obtained from Fr. 2 as a crude pale yellowish powder and then purified by recrystallization from MeOH. The remainder was chromatographed on a Sephadex LH-20 column with MeOH-H<sub>2</sub>O (1 : 1, v/v), recrystallized from MeOH and yielded 5,7-dihydroxychromone 7-*O*-β-D-glucopyranoside (70 mg, white crystal). Fr. 3 was chromatographed on a Sephadex LH-20 column with MeOH and recrystallized from MeOH to yield naringenin 7-*O*-β-D-glucopyranoside (10 mg, pale yellowish powder).

**Figure S1.  $^1\text{H}$  NMR spectrum of 1**

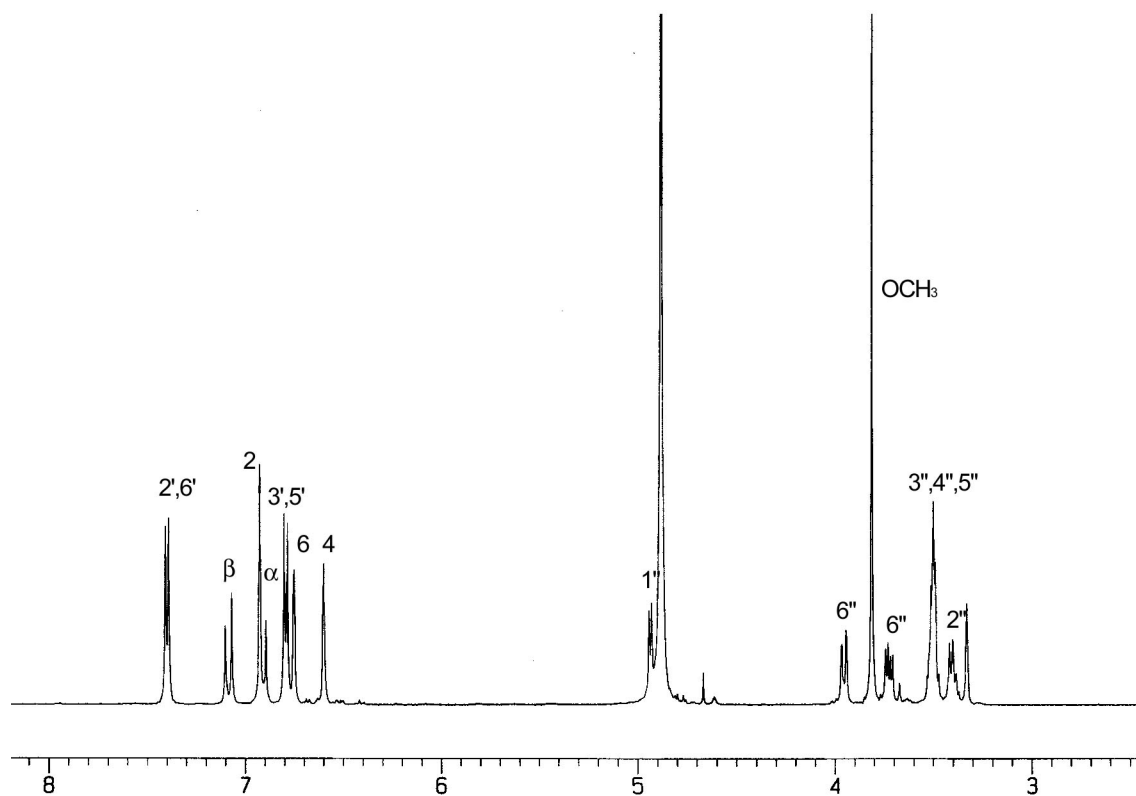

**Figure S2.**  $^{13}\text{C}$  NMR spectrum of **1**

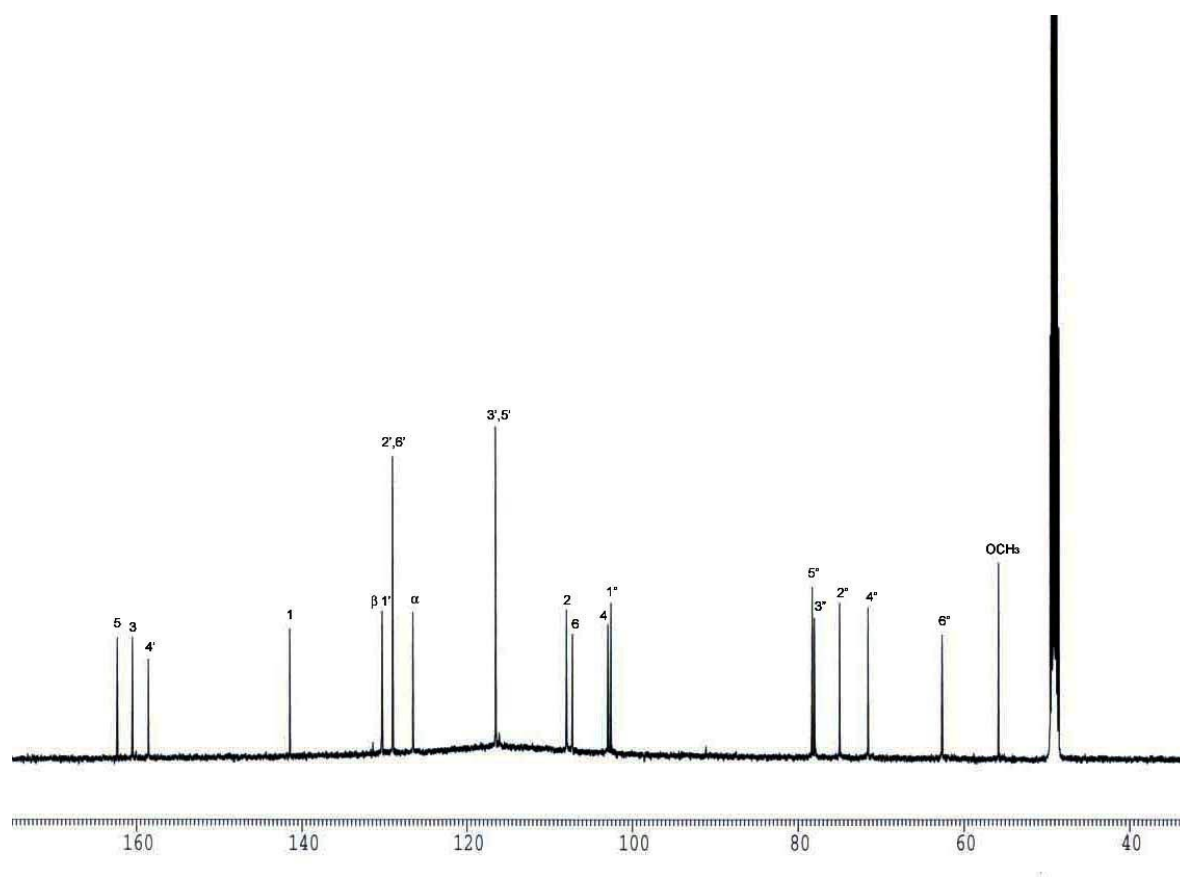

**Figure S3. HMBC spectrum of 1**

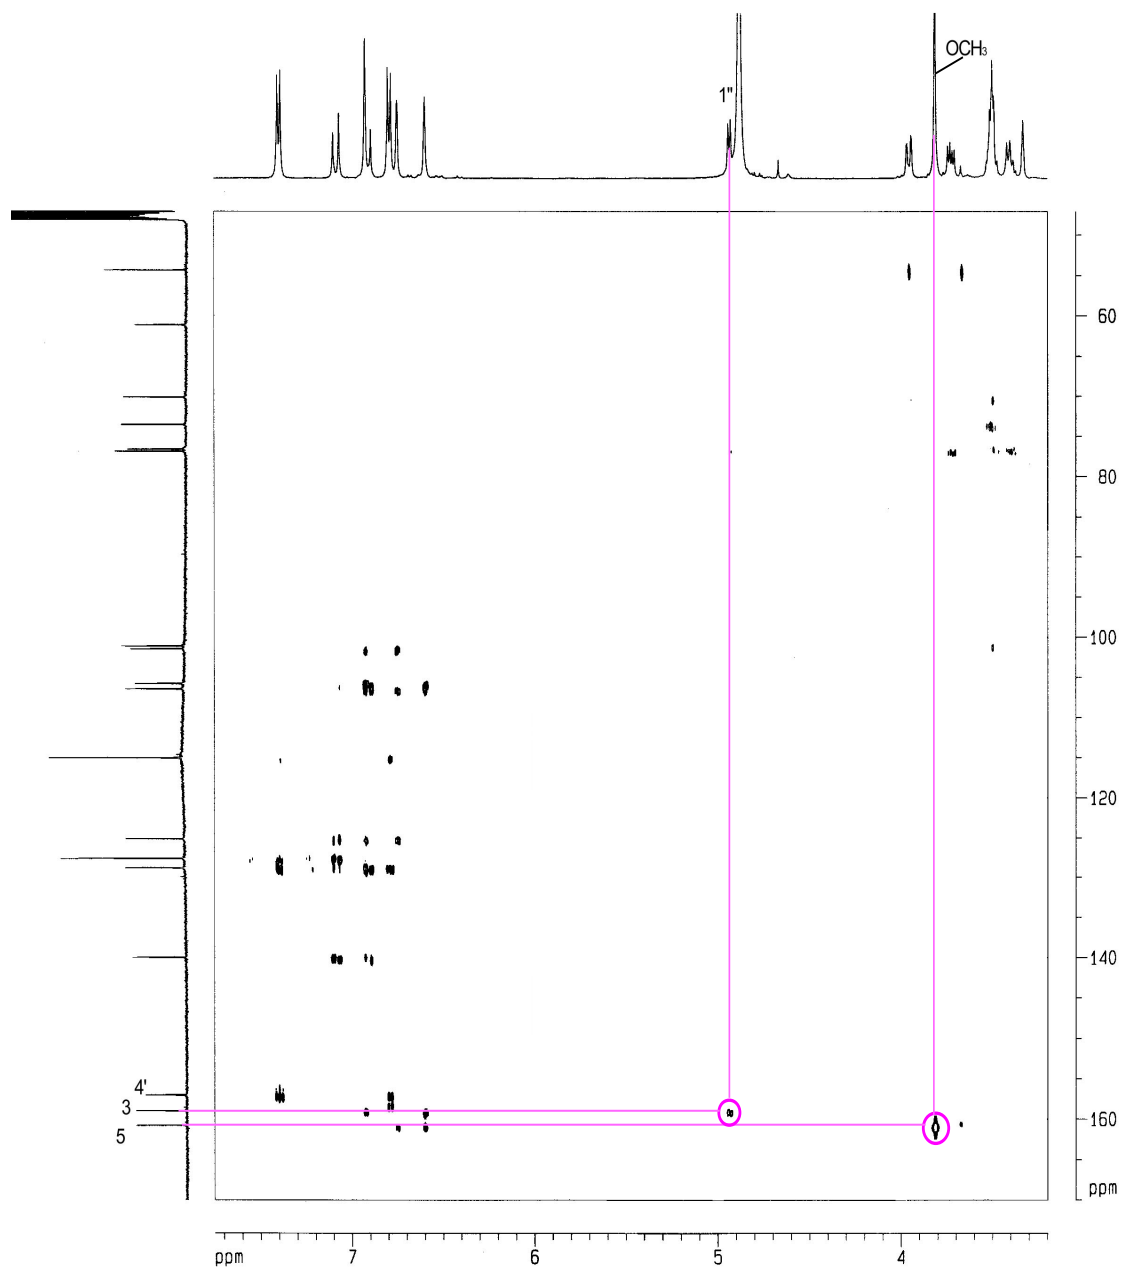

**Figure S4.**  $^1\text{H}$  NMR spectrum of **2**

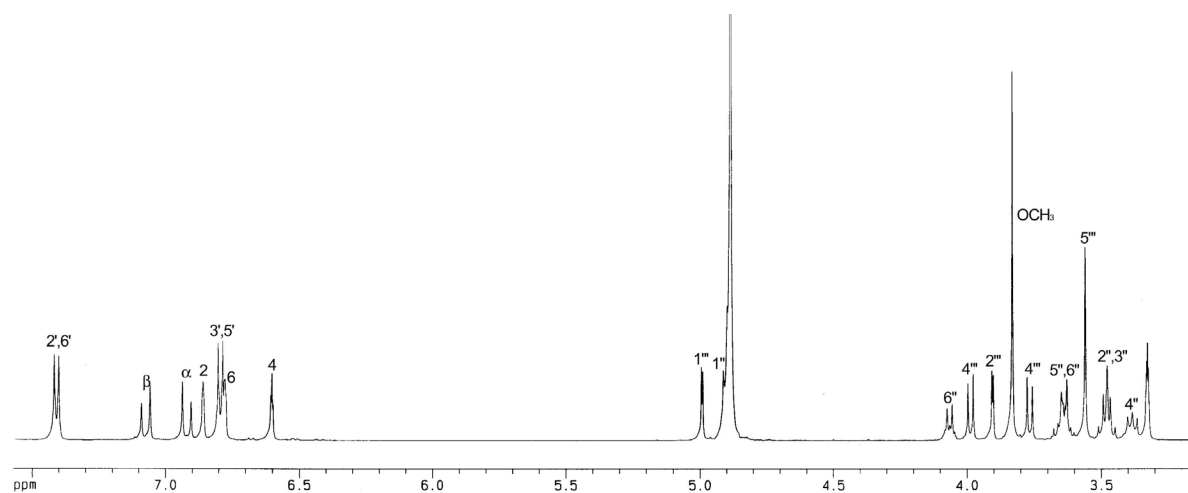

Figure S5.  $^{13}\text{C}$  NMR spectrum of **2**

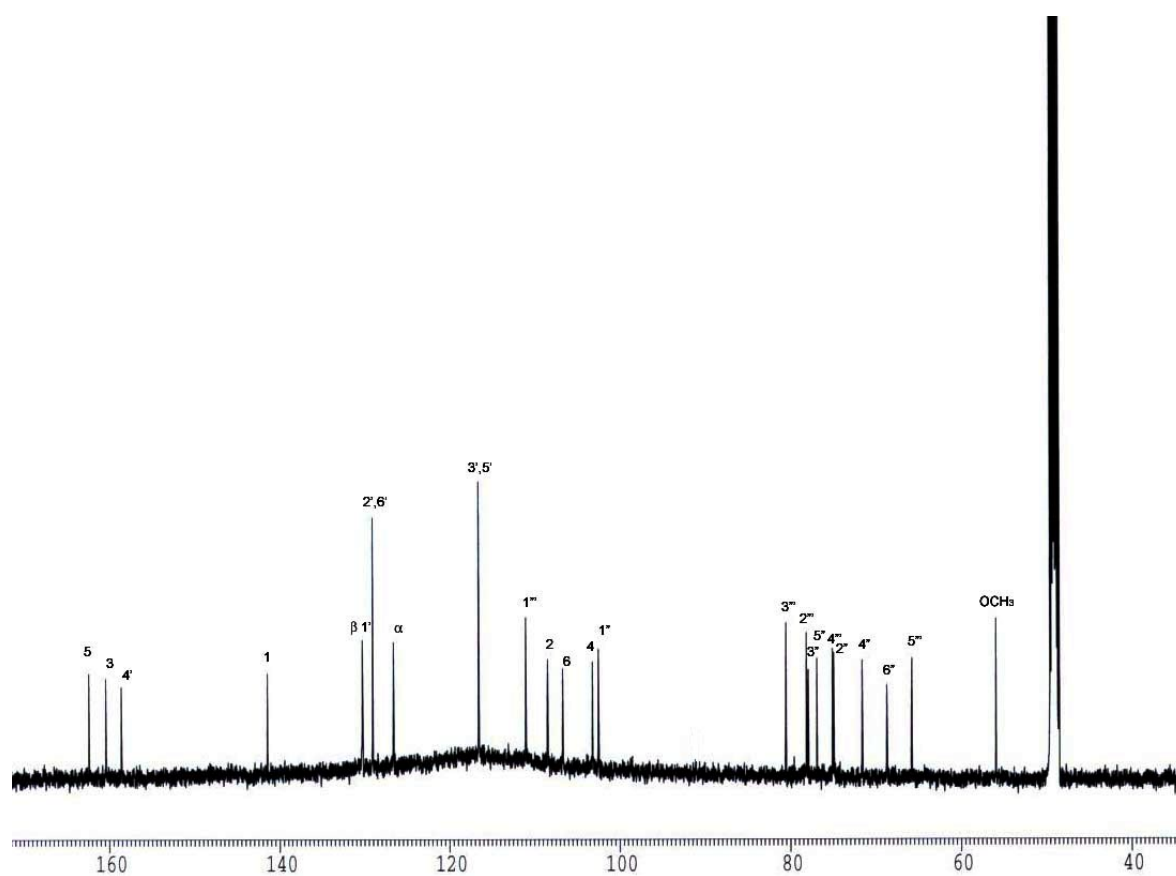



**Figure S6. HMBC spectrum of 2**

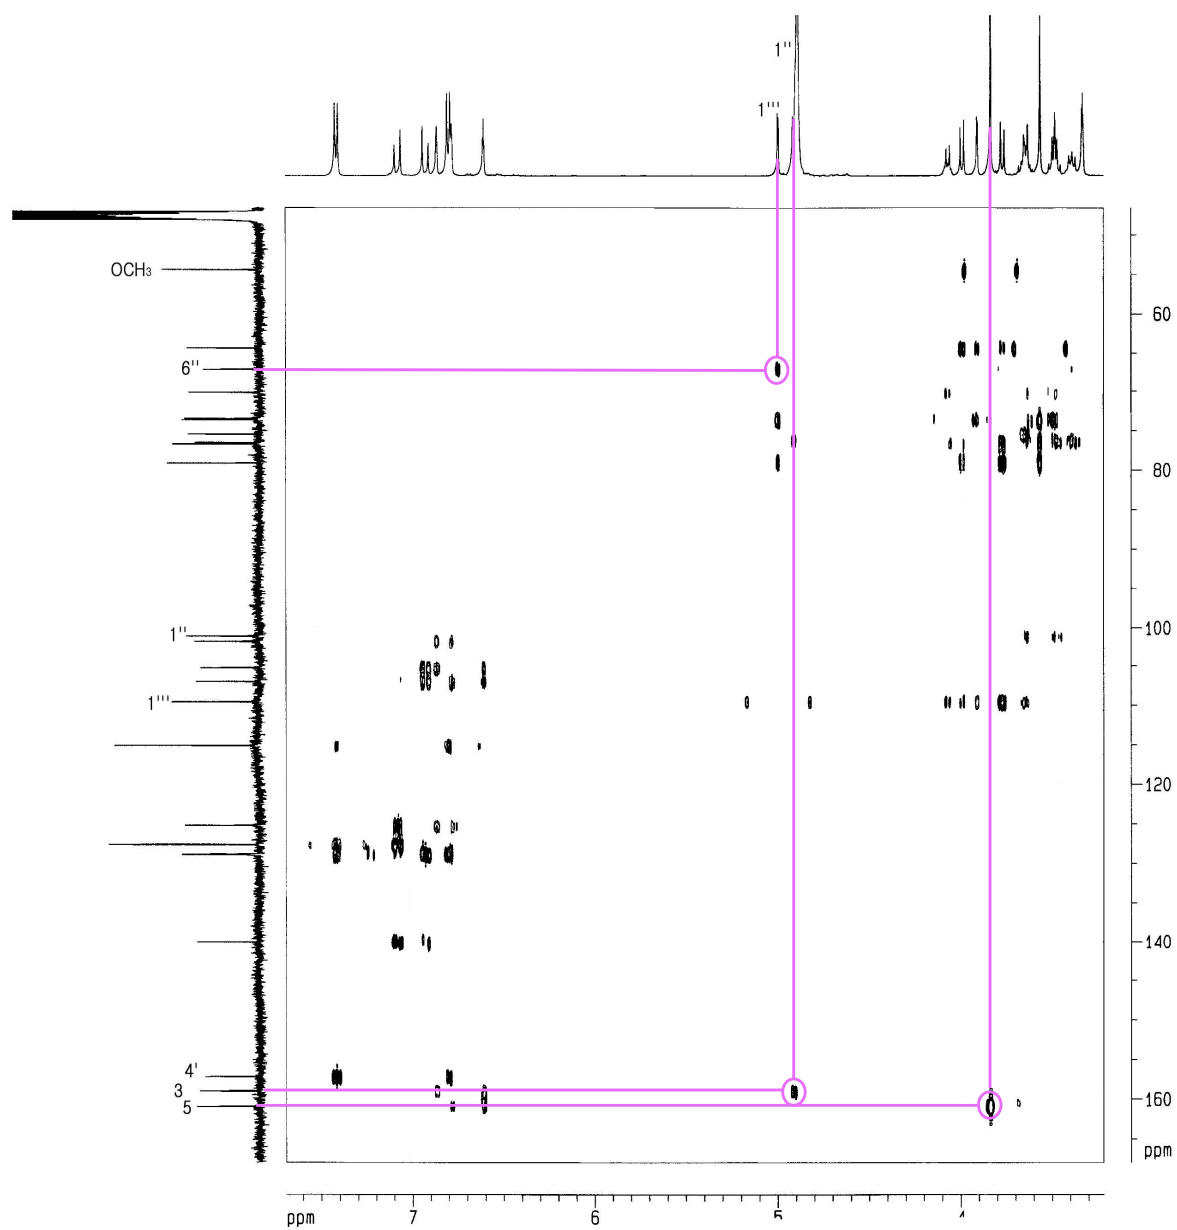

Supplement: Supplementary file 1 [file 5140807]
